# Supplementary material
Source: HighWire-hosted journal article supplement (https://hw-f5-jim.highwire.org/content/70/8/1771)
Supplement: inline-supplementary-material-2 [file inline-supplementary-material-2.pdf]

**Supplementary Table 2. Percentage of patients with Crohn's disease or ulcerative colitis with prescriptions of biologics or corticosteroids<sup>a</sup> (with and without biologics), by US region, history of smoking, and current alcohol user, 2019 IQVIA**

| Patient characteristic                    | Crohn's disease |                        |         |                                             |         |                                                |         | Ulcerative colitis |                        |         |                                             |         |                                                |         |
|-------------------------------------------|-----------------|------------------------|---------|---------------------------------------------|---------|------------------------------------------------|---------|--------------------|------------------------|---------|---------------------------------------------|---------|------------------------------------------------|---------|
|                                           |                 | Biologics <sup>b</sup> |         | Corticosteroids <sup>c</sup> with biologics |         | Corticosteroids <sup>c</sup> without biologics |         |                    | Biologics <sup>b</sup> |         | Corticosteroids <sup>c</sup> with biologics |         | Corticosteroids <sup>c</sup> without biologics |         |
|                                           |                 | %<br>(95% CI)          | P value | %<br>(95% CI)                               | P value | %<br>(95% CI)                                  | P value |                    | %<br>(95% CI)          | P value | %<br>(95% CI)                               | P value | %<br>(95% CI)                                  | P value |
| <b>US region</b>                          |                 |                        |         |                                             |         |                                                |         |                    |                        |         |                                             |         |                                                |         |
| Northeast                                 | 19.5            | 28.7<br>(27.8–29.6)    | <0.001  | 10.4<br>(9.8–11.0)                          | 0.007   | 15.5<br>(14.8–16.2)                            | <0.001  | 19.3               | 13.9<br>(13.2–14.6)    | 0.62    | 5.9<br>(5.4– 6.4)                           | 0.85    | 18.4<br>(17.6–19.1)                            | <0.001  |
| Midwest                                   | 20.0            | 30.7<br>(29.8–31.6)    | 0.05    | 11.0<br>(10.4–11.6)                         | 0.33    | 17.6<br>(16.8–18.3)                            | 0.54    | 19.4               | 13.3<br>(12.7–14.0)    | 0.06    | 5.9<br>(5.5– 6.4)                           | 0.74    | 20.8<br>(20.0–21.6)                            | 0.19    |
| South (ref)                               | 47.4            | 31.7<br>(31.2–32.3)    | —       | 11.4<br>(11.0–11.8)                         | —       | 17.3<br>(16.8–17.8)                            | —       | 45.8               | 14.1<br>(13.7–14.5)    | —       | 5.8<br>(5.5– 6.1)                           | —       | 20.1<br>(19.6–20.6)                            | —       |
| West                                      | 13.0            | 27.0<br>(25.9–28.0)    | <0.001  | 10.6<br>(9.8–11.3)                          | 0.06    | 18.7<br>(17.8–19.6)                            | 0.01    | 15.6               | 12.4<br>(11.7–13.1)    | <0.001  | 6.3<br>(5.7– 6.8)                           | 0.18    | 22.9<br>(22.0–23.8)                            | <0.001  |
| <b>History of smoking<sup>d,f</sup></b>   |                 |                        |         |                                             |         |                                                |         |                    |                        |         |                                             |         |                                                |         |
| Yes                                       | 18.4            | 28.0<br>(26.8–29.2)    | <0.001  | 13.2<br>(12.5–13.8)                         | <0.001  | 23.0<br>(22.1–23.8)                            | <0.001  | 15.4               | 12.8<br>(11.8–13.8)    | 0.09    | 6.8<br>(6.3– 7.4)                           | <0.001  | 25.3<br>(24.4–26.3)                            | <0.001  |
| No (ref)                                  | 81.6            | 30.6<br>(30.1–31.0)    | —       | 10.5<br>(10.2–10.8)                         | —       | 15.9<br>(15.5–16.2)                            | —       | 84.6               | 13.7<br>(13.4–14.0)    | —       | 5.8<br>(5.6– 6.0)                           | —       | 19.4<br>(19.1–19.8)                            | —       |
| <b>Current alcohol user<sup>e,f</sup></b> |                 |                        |         |                                             |         |                                                |         |                    |                        |         |                                             |         |                                                |         |
| Yes                                       | 30.2            | 33.9<br>(33.1–34.6)    | <0.001  | 10.1<br>(9.7–10.6)                          | <0.001  | 14.0<br>(13.5–14.6)                            | <0.001  | 31.9               | 15.1<br>(14.5–15.6)    | <0.001  | 5.5<br>(5.2– 5.9)                           | 0.01    | 17.1<br>(16.6–17.7)                            | <0.001  |
| No (ref)                                  | 69.8            | 28.8<br>(28.3–29.2)    | —       | 11.4<br>(11.1–11.7)                         | —       | 18.5<br>(18.1–18.9)                            | —       | 68.1               | 13.0<br>(12.6–13.3)    | —       | 6.1<br>(5.9– 6.4)                           | —       | 21.9<br>(21.4–22.3)                            | —       |

Abbreviations: CI, confidence interval; Ref, referent group.

<sup>a</sup>With or without a biologic prescription within the same calendar year. The denominators are all patients with CD or UC.

<sup>b</sup>Including adalimumab, infliximab, certolizumab, golimumab, vedolizumab, natalizumab, and ustekinumab.

<sup>c</sup>Including prednisone, prednisolone, methylprednisolone, hydrocortisone, and budesonide.

<sup>d</sup>A history of smoking includes current smokers and former smokers who use cigarettes, tobaccos, or e-cigarettes. It is defined as an affirmative response to both criteria of smoking-related SNOMED codes and clauses "tobacco or cigarette smoking" or "ex-smoker or former smoker".

<sup>e</sup>Current alcohol users are patients who currently drink alcohol. It is defined when SNOMED codes are any of '219006', '228281002', and '7200002'.

<sup>f</sup>The information for a history of smoking status and current alcohol use status were obtained from another IQVIA database OMOP (Observational Medical Outcomes Partnership) with standardized vocabulary through linkage.
